# Supplementary material for: A consensus S. cerevisiae metabolic model Yeast8 and its ecosystem for comprehensively probing cellular metabolism
Source: PubMed Central journal article supplement (PMC6687777; doi:10.1038/s41467-019-11581-3), 2019-08-08
Supplement: 41467_2019_11581_MOESM3_ESM.pdf [file 41467_2019_11581_MOESM3_ESM.pdf]

## **Description of Additional Supplementary Files**

File Name: Supplementary Data 1

Description: Biolog growth test results for *S. cerevisiae* S288c under different substrate sources (green color means that the related substrates could be used by this strain)
